# Supplementary material
Source: HighWire-hosted journal article supplement (https://www.annfammed.org/highwire/filestream/7465/field_highwire_adjunct_files/0/Galliher_Supp_App.pdf)
Supplement: Galliher_Supp_App.pdf [file Galliher_Supp_App.pdf]

**Online Supplementary Material**

Gallihier JM, Bonham, AJ, Dickinson ML, Staton EW, Pace WD. Representativeness of PBRN physician practice patterns and related beliefs: the case of the AAFP National Research Network. *Ann Fam Med*. 2009;7(6):547-554.

<http://www.annfammed.org/cgi/content/full/7/6/547/DC1>

**Supplemental Table 1. Physician and Practice Variables Describing AAFP Active Members Available in AAFP Master Member Database at Time of 3 Surveys**

| Physician and Practice Variables    | Percentage (No.) of Cases With Missing Data     |                                                    |                                                 |
|-------------------------------------|-------------------------------------------------|----------------------------------------------------|-------------------------------------------------|
|                                     | Hepatitis C Survey <sup>a</sup><br>(N = 34,467) | Hyperlipidemia Survey <sup>b</sup><br>(N = 33,233) | Pharyngitis Survey <sup>b</sup><br>(N = 33,200) |
| Components of practice <sup>c</sup> |                                                 |                                                    |                                                 |
| Critical care unit                  | 0.0 (0)                                         | 0.0 (0)                                            | 0.0 (0)                                         |
| Emergency room                      | 0.0 (0)                                         | 0.0 (0)                                            | 0.0 (0)                                         |
| Intensive care unit                 | 0.0 (0)                                         | 0.0 (0)                                            | 0.0 (0)                                         |
| Obstetrics                          | 0.0 (0)                                         | 0.0 (0)                                            | 0.0 (0)                                         |
| Pediatrics                          | 0.0 (0)                                         | 0.0 (0)                                            | 0.0 (0)                                         |
| Surgery                             | 0.0 (0)                                         | 0.0 (0)                                            | 0.0 (0)                                         |
| Census region <sup>d</sup>          | 0.0 (0)                                         | 0.0 (0)                                            | 0.0 (0)                                         |
| Sex                                 | 0.07 (24)                                       | 0.07 (22)                                          | 0.07 (22)                                       |
| Practice arrangement <sup>e</sup>   | 3.2 (1,088)                                     | 3.2 (1,059)                                        | 3.2 (1,062)                                     |
| Practice base <sup>f</sup>          | 0.05 (16)                                       | 0.04 (14)                                          | 0.04 (14)                                       |
| Practice location <sup>g</sup>      | 4.0 (1,375)                                     | 0.04 (14)                                          | 0.03 (9)                                        |
| Practice major owner <sup>h</sup>   | 0.38 (132)                                      | 0.37 (123)                                         | 0.37 (121)                                      |
| Age                                 | 0.67 (232)                                      | 0.57 (190)                                         | 0.57 (195)                                      |
| Years since medical school          | 0.07 (26)                                       | 0.08 (25)                                          | 0.08 (25)                                       |

AAFP = American Academy Family Physicians; MCO = managed care organization; metro = metropolitan.

<sup>a</sup> Cases were eligible for random selection if they reported time in direct patient care of at least 40%.

<sup>b</sup> Cases were eligible for random selection if they reported time in direct patient care of at least 50%.

<sup>c</sup> Categories are yes and no.

<sup>d</sup> Categories are Northwest, Midwest, South, and West.

<sup>e</sup> Categories are solo, 2-person partnership, family medicine group, multispecialty group, other.

<sup>f</sup> Categories are office, hospital, other.

<sup>g</sup> Categories are central county population < 1 million, fringe county population > 1 million, metro area 250,000 to 1 million, metro area < 250,000, ≥20,000 adjacent to metro area, ≥20,000 not adjacent to metro area, 2,500 to 20,000 adjacent to metro area, 2,500 to 20,000 not adjacent to metro area, < 2,500 adjacent to metro area, and < 2,500 not adjacent to metro area.

<sup>h</sup> Categories are self, medical group practice, hospital/health system, MCO/insurance, government, and other.

Online Supplementary Data

<http://www.annfammed.org/cgi/content/full/7/6/547/DC1>

**Supplemental Table 2. Demographic Differences Between AAFP Membership and AAFP Survey Respondents Across 3 National Surveys**

| Demographic Characteristic | Hepatitis C Survey |           | Hyperlipidemia Survey |           | Pharyngitis Survey |           |
|----------------------------|--------------------|-----------|-----------------------|-----------|--------------------|-----------|
|                            | AAFP Members       | AAFP Resp | AAFP Members          | AAFP Resp | AAFP Members       | AAFP Resp |
| Component of practice      |                    |           |                       |           |                    |           |
| Critical care unit, % yes  | 39.9               | 39.9      | 39.6                  | 42.4      | 39.6               | 41.3      |
| Emergency room, % yes      | 40.7               | 39.2      | 40.4                  | 40.1      | 40.5               | 42.7      |
| Intensive care unit, % yes | 47.4               | 47.6      | 47.3 <sup>A</sup>     | 52.1      | 47.2               | 48.9      |
| Obstetrics, % yes          | 26.5               | 30.3      | 25.7                  | 27.5      | 25.7 <sup>A</sup>  | 30.9      |
| Pediatrics, % yes          | 86.3 <sup>B</sup>  | 89.9      | 86.3 <sup>B</sup>     | 90.2      | 86.3               | 88.0      |
| Surgery, % yes             | 30.2               | 30.0      | 30.0                  | 31.7      | 30.0               | 29.3      |
| No. of cases               | 34,467             | 597       | 32,233                | 641       | 33,200             | 583       |
| Census region              |                    |           |                       |           |                    |           |
| Northeast, %               | 14.1               | 14.6      | 14.0                  | 15.8      | 14.2               | 16.8      |
| Midwest, %                 | 28.9               | 26.6      | 28.7                  | 29.6      | 28.6               | 25.7      |
| South, %                   | 34.8               | 34.2      | 34.9                  | 30.6      | 34.8               | 30.5      |
| West, %                    | 22.2               | 24.6      | 22.3                  | 24.0      | 22.3               | 26.9      |
| No. of cases               | 34,467             | 597       | 32,233                | 641       | 33,200             | 583       |
| Probability                | .710               |           | .391                  |           | .094               |           |
| Sex                        |                    |           |                       |           |                    |           |
| Male, %                    | 70.7               | 69.7      | 70.7                  | 70.4      | 70.7               | 71.7      |
| Female, %                  | 29.3               | 30.3      | 29.3                  | 29.6      | 29.3               | 28.3      |
| No. of cases               | 34,467             | 597       | 32,233                | 641       | 33,200             | 583       |
| Probability                | .704               |           | .903                  |           | .698               |           |
| Practice arrangement       |                    |           |                       |           |                    |           |
| Solo, %                    | 19.4               | 15.4      | 19.7                  | 16.7      | 19.7               | 17.2      |
| 2-person partnership, %    | 8.5                | 9.4       | 8.8                   | 10.3      | 8.7                | 7.5       |
| Family medicine group, %   | 40.0               | 44.1      | 39.8                  | 44.1      | 39.7               | 43.2      |
| Multispecialty group, %    | 21.9               | 22.4      | 21.9                  | 22.0      | 21.9               | 22.3      |
| Other, %                   | 10.2               | 8.7       | 9.8                   | 6.9       | 9.9                | 9.8       |
| No. of cases               | 34,467             | 597       | 32,233                | 641       | 33,200             | 583       |
| Probability                | .298               |           | .126                  |           | .660               |           |
| Office base                |                    |           |                       |           |                    |           |
| Office, %                  | 90.8               | 93.0      | 91.0                  | 94.2      | 91.1               | 90.6      |
| Hospital, %                | 6.2                | 4.2       | 6.2                   | 3.0       | 6.2                | 5.8       |
| Other, %                   | 3.0                | 2.8       | 2.8                   | 2.8       | 2.7                | 3.6       |
| No. of cases               | 34,467             | 597       | 32,233                | 641       | 33,200             | 583       |
| Probability                | .289               |           | .020                  |           | .690               |           |

Supplemental Table 2, continued

Online Supplementary Data

http://www.annfammed.org/cgi/content/full/7/6/547/DC1

**Supplemental Table 2. Demographic Differences Between AAFP Membership and AAFP Survey Respondents Across 3 National Surveys (continued)**

| Demographic Characteristic            | Hepatitis C Survey |           | Hyperlipidemia Survey |           | Pharyngitis Survey |           |
|---------------------------------------|--------------------|-----------|-----------------------|-----------|--------------------|-----------|
|                                       | AAFP Members       | AAFP Resp | AAFP Members          | AAFP Resp | AAFP Members       | AAFP Resp |
| Practice location                     |                    |           |                       |           |                    |           |
| Central county pop < 1 million, %     | 0.5                | 0.4       | 0.6                   | 0.8       | 0.3                | 0.3       |
| Fringe county pop > 1 million, %      | 38.3               | 38.0      | 39.2                  | 39.3      | 39.4               | 39.1      |
| Metro area 250,000-1 million, %       | 23.7               | 22.8      | 23.2                  | 23.9      | 23.3               | 25.0      |
| Metro area < 250,000, %               | 11.3               | 10.0      | 12.8                  | 12.5      | 12.8               | 11.1      |
| 20,000+ adjacent to metro area, %     | 5.7                | 6.1       | 6.2                   | 5.5       | 6.2                | 6.9       |
| 20,000+ not adjacent to metro area, % | 4.7                | 4.3       | 3.1                   | 2.7       | 3.1                | 3.8       |
| 2,500-20,000 adjacent metro area, %   | 8.1                | 7.7       | 7.6                   | 8.4       | 7.5                | 7.4       |
| 2,500-20,000 not adjacent metro, %    | 5.0                | 7.0       | 4.8                   | 5.0       | 5.0                | 3.9       |
| < 2,500 adjacent to metro area, %     | 1.0                | 1.4       | 0.9                   | 0.8       | 1.0                | 0.9       |
| < 2,500 not adjacent metro area, %    | 1.7                | 2.4       | 1.4                   | 1.2       | 1.4                | 1.5       |
| No. of cases                          | 34,467             | 597       | 32,233                | 641       | 33,200             | 583       |
| Probability                           | .914               |           | .999                  |           | .980               |           |
| Major owner of practice, %            |                    |           |                       |           |                    |           |
| Self                                  | 24.4               | 22.9      | 25.0                  | 24.3      | 25.0               | 25.2      |
| Medical group                         | 26.9               | 28.1      | 27.3                  | 26.1      | 27.3               | 28.0      |
| Hospital/health system                | 29.1               | 28.8      | 28.9                  | 31.2      | 28.8               | 27.1      |
| MCO/Insurance company                 | 3.2                | 3.0       | 3.1                   | 2.2       | 3.1                | 3.6       |
| Government entity                     | 9.2                | 9.2       | 8.7                   | 8.0       | 8.7                | 9.4       |
| Other                                 | 7.2                | 7.9       | 7.0                   | 8.3       | 7.0                | 6.7       |
| No. of cases                          | 3,4467             | 597       | 32,233                | 641       | 33,200             | 583       |
| Probability                           | .986               |           | .736                  |           | .978               |           |
| Age                                   |                    |           |                       |           |                    |           |
| Mean years                            | 46.4               | 45.7      | 47.3                  | 47.1      | 47.3               | 46.8      |
| No. of cases                          | 3,4467             | 597       | 32233                 | 641       | 33,200             | 583       |
| Probability                           | .057               |           | .726                  |           | .208               |           |
| Years since medical school            |                    |           |                       |           |                    |           |
| Means years                           | 18.5               | 18.2      | 19.2                  | 19.1      | 18.3               | 18.1      |
| No. of cases                          | 34,467             | 597       | 32,233                | 641       | 33200              | 583       |
| Probability                           | .478               |           | .719                  |           | .638               |           |
| Time in patient care                  |                    |           |                       |           |                    |           |
| Mean %                                | 88.6               | 90.5      | 82.8                  | 82.0      | 89.6               | 89.0      |
| No. of cases                          | 34,467             | 597       | 32,233                | 641       | 33,200             | 583       |
| Probability                           | < .001             |           | .496                  |           | .230               |           |

MCO = managed care organization; metro = metropolitan; pop = population; resp = respondents.

Note: Statistical comparisons based on  $\chi^2$  goodness-of-fit tests for 12 categorical items and z score, 1-sample tests for 3 continuous items.

<sup>a</sup>  $P < .10$

<sup>b</sup>  $P < .05$

**Supplemental Table 3. Clinical Topic Areas of Items Covered Within 3 National Surveys**

Clinical areas for hepatitis C survey (87 items)

1. Hepatitis C in practice
2. Beliefs and perceptions regarding hepatitis C
3. Testing for hepatitis C
4. Therapy for hepatitis C
5. Referral of patients with hepatitis C

Clinical areas for hyperlipidemia C survey (21 items)

1. Assessing/screening patients for hyperlipidemia
2. Treatment and therapy for patients with hyperlipidemia
3. Beliefs and perceptions regarding hyperlipidemia

Clinical areas for pharyngitis survey (31 items)

1. Testing using throat culture
2. Testing using rapid strep test
3. Use of antibiotics without diagnosis validation
4. Use of antibiotics with diagnosis validation

Note: Excludes demographic items. Survey instruments available upon request from first author.
